# Supplementary material for: Morphological Phenotypes, Cell Division, and Gene Expression of Escherichia coli under High Concentration of Sodium Sulfate
Source: MDPI journal article supplement (doi:10.3390/microorganisms10020274), 2022-01-25
Supplement: s1 [file s1]

Article

# Supplementary Information: Morphological phenotypes, cell division, and gene expression of *Escherichia coli* under high concentration of Sodium Sulfate

Khanh Nguyen<sup>1</sup> and Pradeep Kumar<sup>1\*</sup>

<sup>1</sup> Department of Physics, University of Arkansas, Fayetteville, AR, 72701 USA

Version January 13, 2022 submitted to Microorganisms

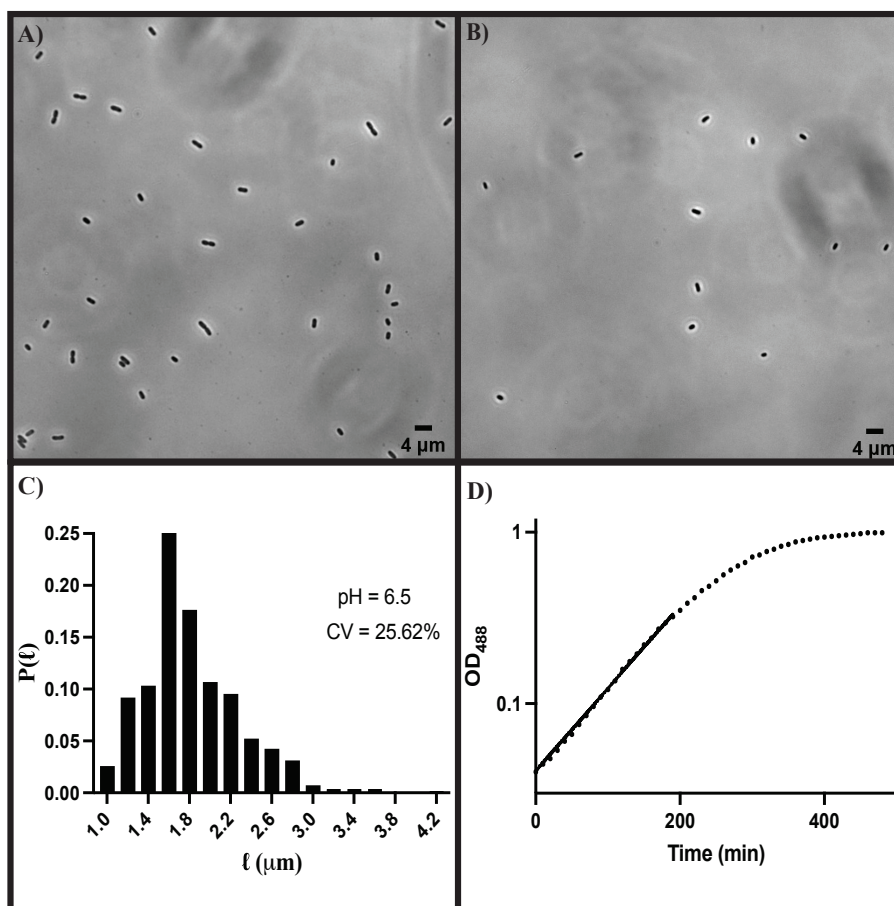

**Fig. S 1.** Representative images of cells grown at (A) at pH= 7.0, and (B) at pH= 6.45. (C) Probability distribution of cell length at pH=6.45. (D) Linear-log plot of the growth curve of the cells at pH= 6.45. The doubling time ( $\tau_d = 60 \pm 5$  min) decreases by a small amount compared to cells grown in pH= 7. Both the cell morphology and cell growth exhibit negligible changes in morphology compared to cells grown in 1.0 m  $\text{Na}_2\text{SO}_4$ , corresponding to the lowest pH= 6.45.

1 © 2022 by the authors. Submitted to *Microorganisms* for possible open access publication  
 2 under the terms and conditions of the Creative Commons Attribution (CC BY) license  
 3 (<http://creativecommons.org/licenses/by/4.0/>).

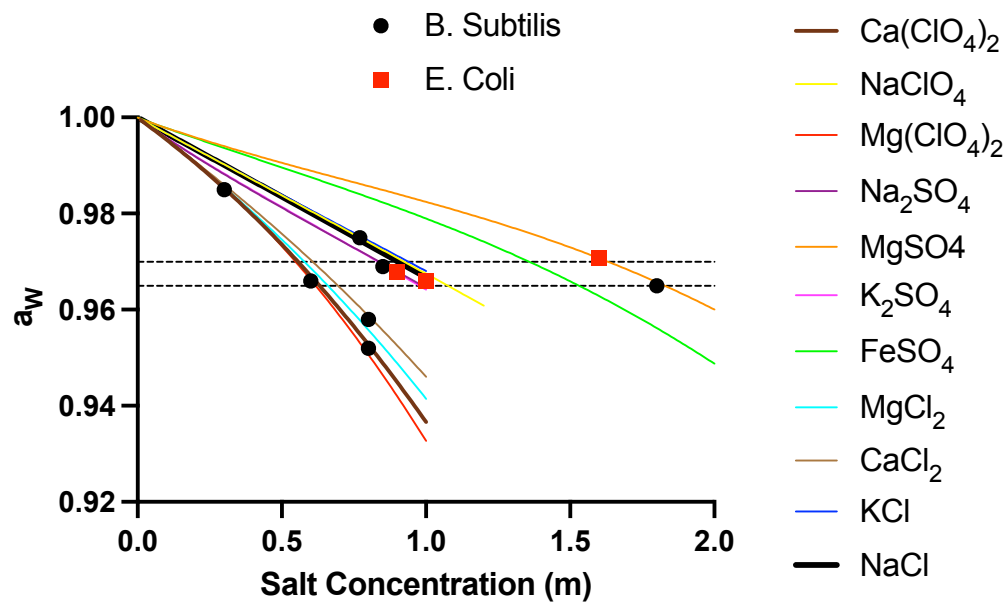

**Fig. S 2.** Water activity,  $a_w$ , as a function of salt concentration of various salts. We also show the limiting water activity for *E. coli* (squares) and *B. Subtilis* (circles) in different salts. Dotted lines are constant  $a_w$  lines for  $a_w = 0.965$  and  $a_w = 0.970$ .
